# Supplementary material for: Multimodal gradients of basal forebrain connectivity across the neocortex
Source: PubMed Central journal article supplement — Nat Commun. 2024 Oct 18;15:8990. doi: 10.1038/s41467-024-53148-x (PMC11487139; doi:10.1038/s41467-024-53148-x), 2024-10-18
Supplement: 41467_2024_53148_MOESM3_ESM.pdf [file 41467_2024_53148_MOESM3_ESM.pdf]

## **Description of Additional Supplementary Files:**

**Supplemental Data 1:** Streamline counts. The excel file detailing the streamlines received at each of the cortical parcels (left and right combined) from the BF (all voxels)(n=173).
